# Supplementary material for: Redox active azo-based metal–organic frameworks as anode materials for lithium-ion batteries
Source: Royal Society of Chemistry journal article supplement (doi:10.1039/c8nj05014g), 2019-01-01
Supplement: c8nj05014g1.pdf [file c8nj05014g1.pdf]

### Supporting Information

#### Redox active azo-based metal-organic frameworks as anode materials for lithium-ion batteries

Yan Zhou, Mengke Wu, Yulin Luo, Baocheng Pang, Xiaoru Su, Mingjiong Zhou,\* and Lei Han\*

School of Materials Science & Chemical Engineering, Ningbo University, Ningbo, Zhejiang 315211, P. R. China.

E-mail: [hanlei@nbu.edu.cn](mailto:hanlei@nbu.edu.cn); [zhoumingjiong@nbu.edu.cn](mailto:zhoumingjiong@nbu.edu.cn).

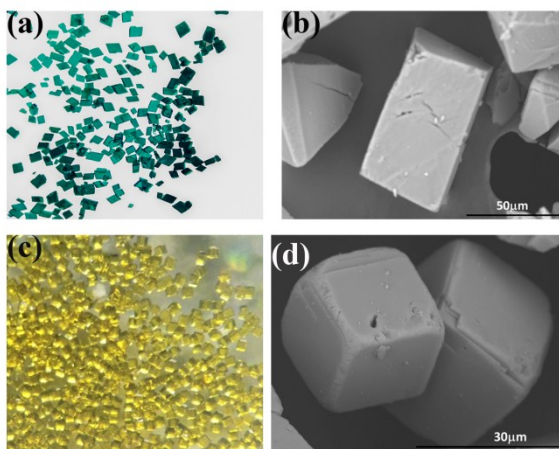

**Fig. S1** (a) The optical microscope image of **1**; (b) SEM image of **1**; (c) The optical microscope image of **2**; (d) SEM image of **2**.

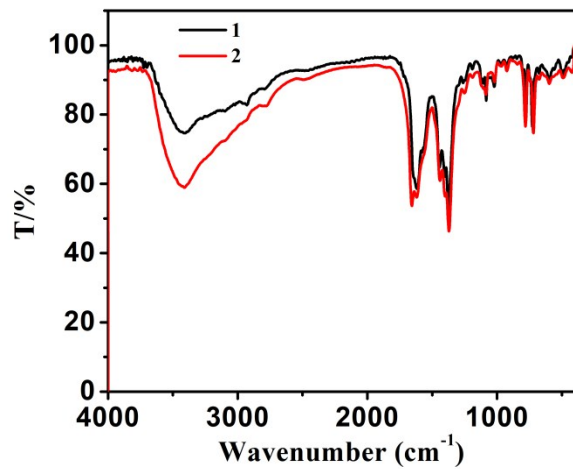

Fig. S2 FT-IR spectra in 1 and 2.

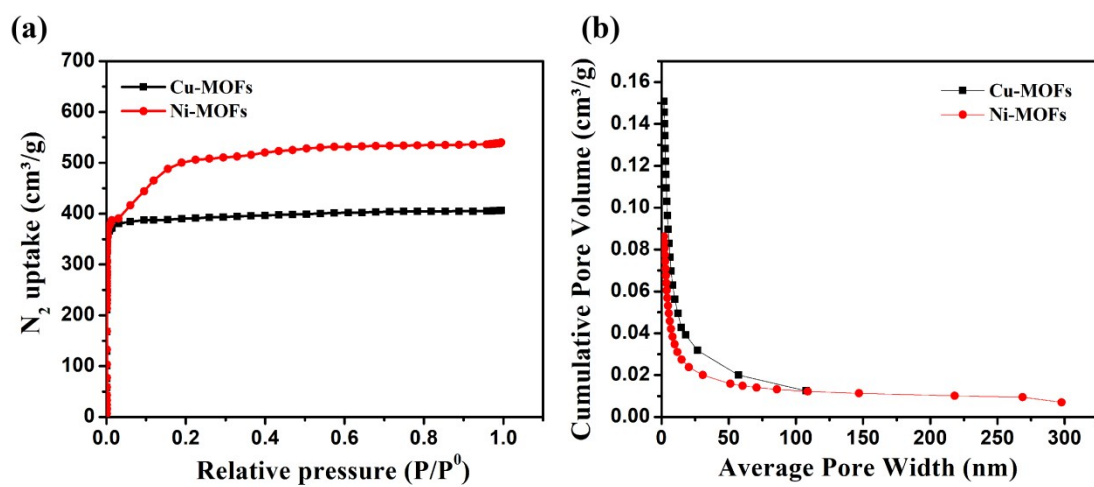

Fig. S3 (a) N<sub>2</sub> adsorption isotherms; (b) Pore size distributions in Cu-MOFs and Ni-MOFs.

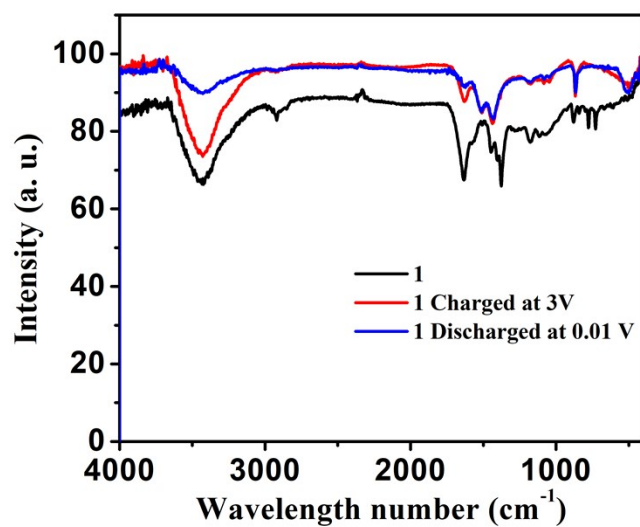

Fig. S4 FT-IR spectra of **1** electrode.

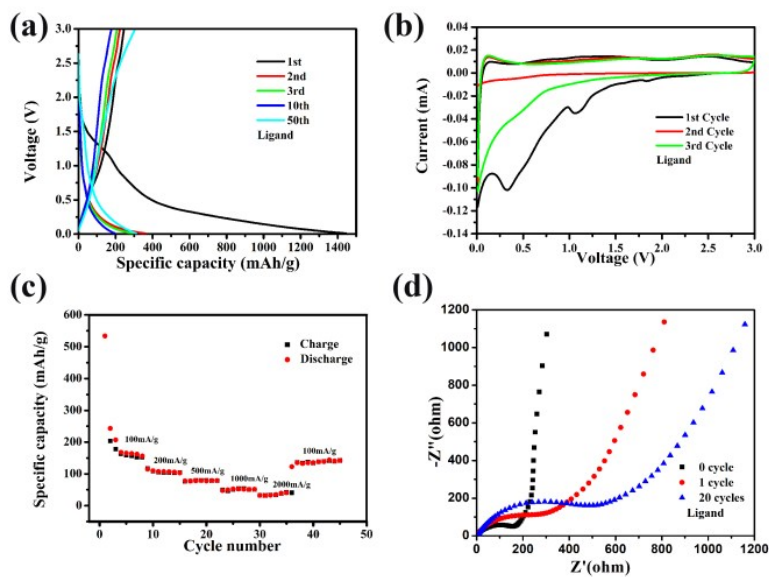

Fig. S5 (a) Galvanostatic discharge-charge curves of ligand; (b) CV curves of ligand at a scan rate of  $0.1 \text{ mV s}^{-1}$ ; (c) Rate performance of ligand at different current densities; (d) Nyquist plots of the ligand electrode.

**Table S1.** Comparison capacity of pristine MOFs as anode materials for LIBs and other reported work.

| Materials                                                                                                                    | Current density (A g <sup>-1</sup> ) | Cycle no. | Capacity (mAh·g <sup>-1</sup> ) |             | Ref       |
|------------------------------------------------------------------------------------------------------------------------------|--------------------------------------|-----------|---------------------------------|-------------|-----------|
|                                                                                                                              |                                      |           | Initial cycle                   | Final cycle |           |
| Cu-MOFs                                                                                                                      | 0.1                                  | 500       | 1027.7                          | 480         | This work |
| Ni-MOFs                                                                                                                      | 0.1                                  | 500       | 1560.6                          | 760         | This work |
| MOF-177                                                                                                                      | 0.05                                 | 50        | 400                             | 105         | 39        |
| Co/Mn-MOFs                                                                                                                   | 0.1                                  | 200       | 1170–1400                       | 580–595     | 40        |
| Si@MOF                                                                                                                       | 0.2                                  | 500       | 1050                            | 830         | 41        |
| F-doped Mn-MOF                                                                                                               | 0.1                                  | 100       | 927                             | 727         | 42        |
| Pb-MOF                                                                                                                       | 0.1                                  | 500       | 1522                            | 489         | 43        |
| NNU-11                                                                                                                       | 0.05                                 | 200       | 1322.3                          | 750         | 44        |
| Co-Zn-MOF                                                                                                                    | 2.0                                  | 500       | 2,289                           | 622         | 45        |
| CoBTC                                                                                                                        | 2.0                                  | 500       | 1790.3                          | 473         | 46        |
| Mn-UMOFNs                                                                                                                    | 0.1                                  | 300       | 1187                            | 818         | 47        |
| Ni-UMOFNs                                                                                                                    | 0.1                                  | 300       | 1833                            | 346         |           |
| Cd(HHTPCA)                                                                                                                   | 0.1                                  | 100       | 710                             | 302         | 48        |
| Ni-BHC                                                                                                                       | 0.1                                  | 50        | 1261.3                          | 910.4       | 49        |
| Mn-BTC                                                                                                                       | 0.103                                | 100       | 1717                            | 694         | 50        |
| NENU-507                                                                                                                     | 0.1                                  | 100       | 1008                            | 640         | 51        |
| [Cu <sub>10</sub> (H <sub>3</sub> trz) <sub>4</sub> (Htrz) <sub>4</sub> ](HPW <sub>12</sub> O <sub>40</sub> )                | 0.1                                  | 100       | 1620                            | 570         | 52        |
| [Cu <sub>10</sub> (H <sub>3</sub> trz) <sub>4</sub> (Htrz) <sub>4</sub> ](H <sub>2</sub> SiW <sub>12</sub> O <sub>40</sub> ) | 0.1                                  | 100       | 1245                            | 426         |           |
